# Supplementary material for: Formation and properties of wormlike micelles in solutions of a cationic surfactant with a 2-hydroxypropoxy insertion group
Source: Royal Society of Chemistry journal article supplement (doi:10.1039/c3sm51017d), 2013-01-01

## Supplementary Information

### Formation and Properties of Wormlike Micelles in Cationic Surfactant Solutions with a 2-Hydroxypropoxy Insertion Group

Xi-Lian Wei,\* A-Li Ping, Pan-Pan Du, Jie Liu, De-Zhi Sun,\* Qing-Fu Zhang, Hong-Guo Hao, Hui-Jun Yu

Shandong Provincial Key Laboratory of Chemical Energy Storage and Novel Cell Technology, College of Chemistry and Chemical Engineering, Liaocheng University, Liaocheng, Shandong 252059, P. R. China

#### 1. Surface active parameters of R<sub>16</sub>HTAB and CTAB in aqueous solution at different temperature

|                      | <i>T</i> /<br>°C | <i>cmc</i><br><i>mmol·L<sup>-1</sup></i> | $\gamma_{cmc}$<br><i>mN·m<sup>-1</sup></i> | $\Gamma_m \times 10^{10}$<br><i>mol·cm<sup>-2</sup></i> | Kroff Point<br>°C |
|----------------------|------------------|------------------------------------------|--------------------------------------------|---------------------------------------------------------|-------------------|
| R <sub>16</sub> HTAB | 25               | 0.525                                    | 33.5                                       | 3.93                                                    | 19.0              |
|                      | 30               | 0.417                                    | 33.0                                       | 3.83                                                    |                   |
|                      | 35               | 0.385                                    | 32.8                                       | 3.83                                                    |                   |
|                      | 50               | 0.263                                    | 32.5                                       | 3.79                                                    |                   |
| CTAB                 | 25               | 0.92                                     | 37.8                                       | 3.10                                                    | 22.0              |
|                      | 30               | 0.94                                     | 36.8                                       | 2.92                                                    |                   |
|                      | 35               | 1.13                                     | 37.0                                       | 2.81                                                    |                   |
|                      | 50               | 1.50                                     | 37.6                                       | 2.74                                                    |                   |

#### 2. <sup>1</sup>H NMR spectral data and elemental analysis dates of R<sub>16</sub>HTAX

##### <sup>1</sup>H NMR:

R<sub>16</sub>HTAX: <sup>1</sup>H NMR:  $\delta$  0.86 (3 H, t, CH<sub>3</sub> aliphatic chain); 1.22 (26 H, m, CH<sub>2</sub> aliphatic chain); 1.51 (2 H, m, CH<sub>2</sub> aliphatic chain); 3.41 (4 H, t, 2 O-CH<sub>2</sub>); 3.48 (9 H, s, 3 CH<sub>3</sub>); 3.53 (1 H, m, N-CH<sub>2</sub>-CH); 3.61 (2 H, d, N-CH<sub>2</sub>); 4.52 (1 H, br s, OH).

**Elemental analysis:** Calc. (%) for C<sub>22</sub>H<sub>48</sub>NO<sub>2</sub>Br: C, 60.26; H, 11.03; N, 3.19. Found (%): C, 60.17; H, 10.97; N, 3.29.

#### 3. Zero-shear apparent viscosity of the surfactant system as a function of R<sub>16</sub>HTAB concentration at 30.0 °C

\* Shandong Provincial Key Laboratory of Chemical Energy Storage and Novel Cell Technology, Liaocheng University, Liaocheng, Shandong 252059, P. R. China  
E-mail: weixilian@126.com; Fax: +86-635-8239196; Tel: +86-635-8230613  
sundezhi@lcu.edu.cn Fax: +86-635-8239196; Tel: +86-635-8230614

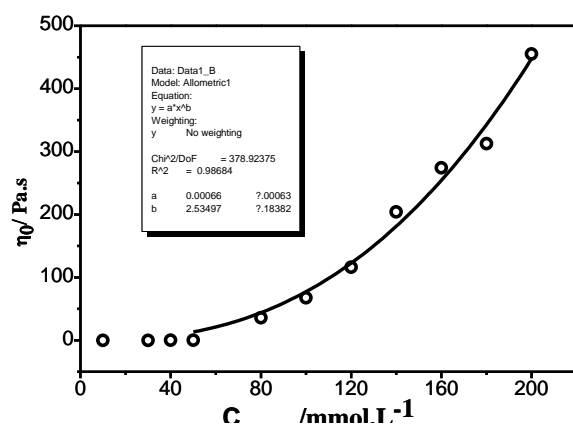

4. The Storage modulus (closed symbol) and loss modulus (open symbol) as a function of angular frequency (a) and the corresponding Cole–Cole plots (b) for solutions at different  $R_{16}$ HTAB concentrations which are illustrated in the figures at 30.0 °C.

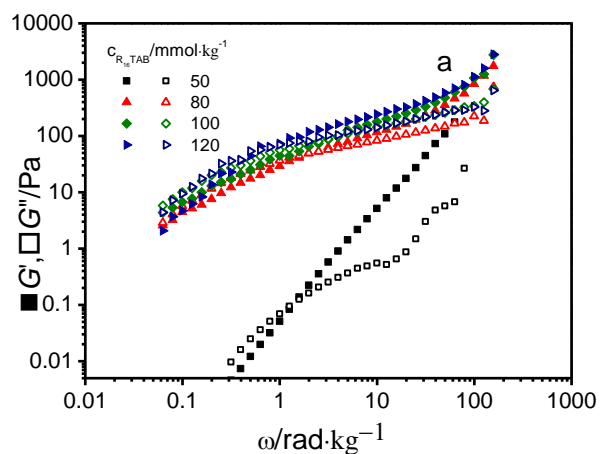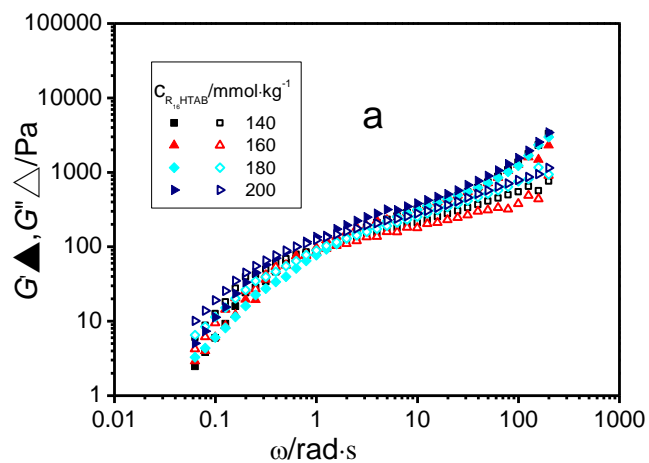

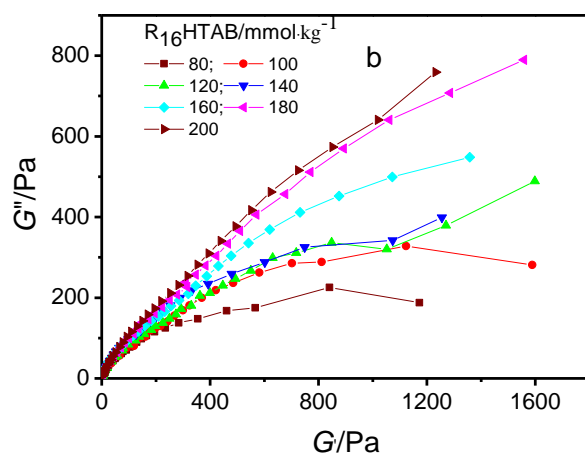

5. Curves of apparent viscosity ( $\eta$ ) versus shear rate ( $\dot{\gamma}$ ) for aqueous solutions of  $R_{16}HTAB$  at different concentrations of NaSal.  $R_{16}HTAB$  concentration: (a) 20.0  $mmol \cdot L^{-1}$ ; (b) 40.0  $mmol \cdot L^{-1}$

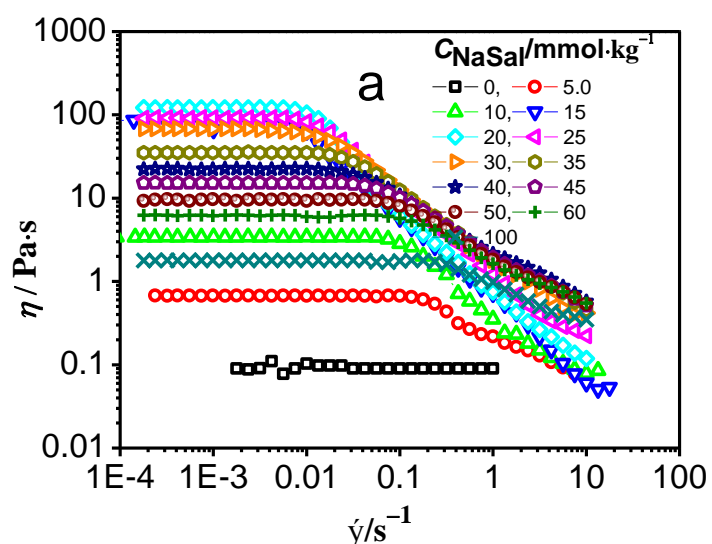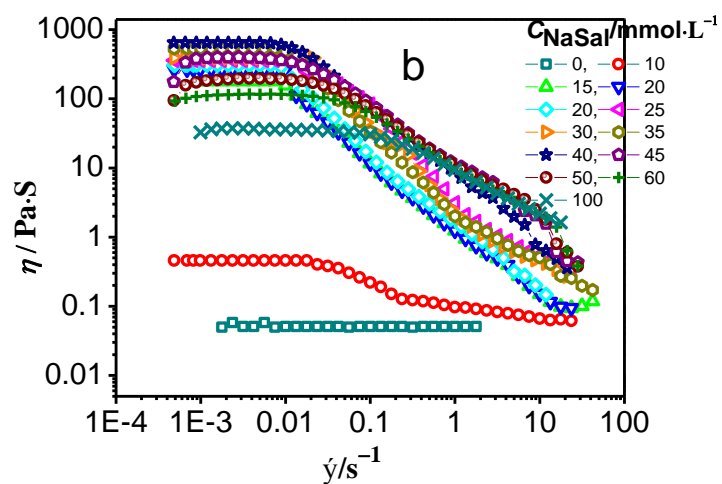

6.  $^1\text{H}$  NMR spectra for  $\text{R}_{16}\text{HTAB}/\text{NaSal}$  systems; K denotes molar ratio of counterion to surfactant. The bottom spectrum is  $\text{R}_{16}\text{HTAB}$  and the second bottom one is  $\text{NaSal}$  in  $\text{D}_2\text{O}$ . Then from down to up, 20, 30, 40 and 60  $\text{mmol}\cdot\text{kg}^{-1}$   $\text{NaSal}$  was added into  $40\text{ mmol}\cdot\text{kg}^{-1}$   $\text{R}_{16}\text{HTAB}$  solutions

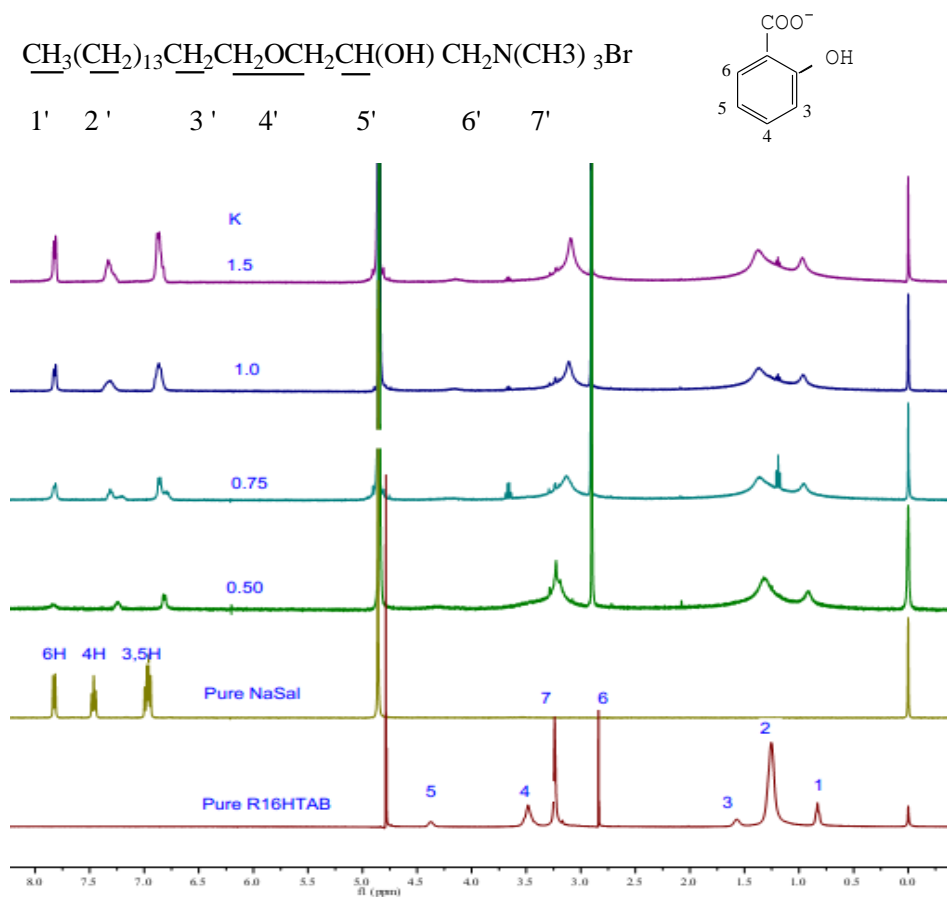

7. Variations of  $G'$  (filled symbols) and  $G''$  (open symbols) with the shear frequency  $\omega$  for aqueous solutions of  $\text{R}_{16}\text{HTAB}$  ( $40\text{ mmol}\cdot\text{kg}^{-1}$ ) (a, b) and the corresponding Cole–Cole plots (c, d), the solid lines represent the best fit to the Maxwell model at 298K. The  $\text{NaSal}$  concentrations are expressed in the Figures.

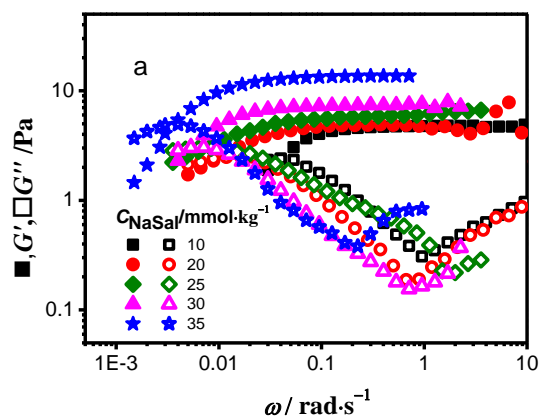

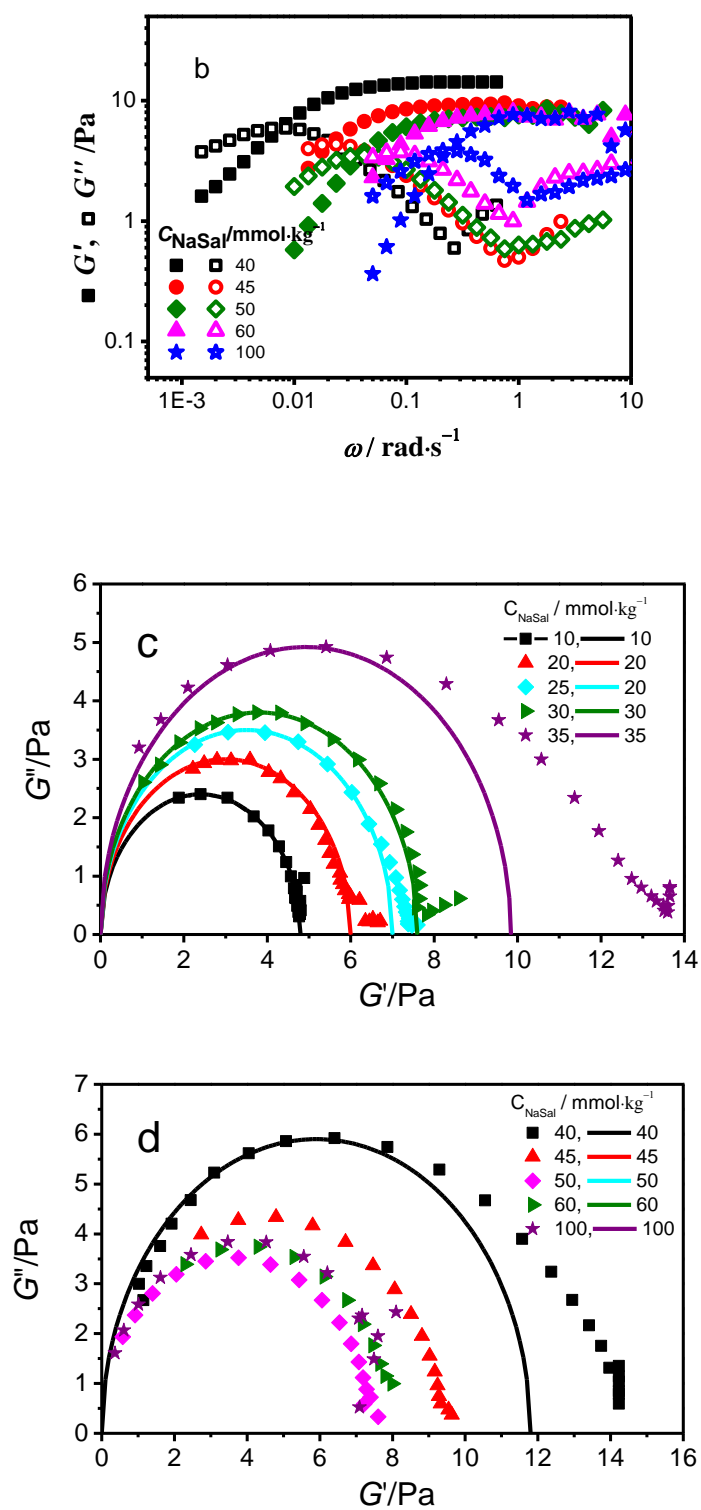

8. Curves of apparent viscosity ( $\eta$ ) versus shear rate ( $\dot{\gamma}$ ) at different temperatures and at a fixed  $R_{16}\text{HTAB}/\text{NaSal}$  molar rate of  $20/40 \text{ mmol}\cdot\text{kg}^{-1}$

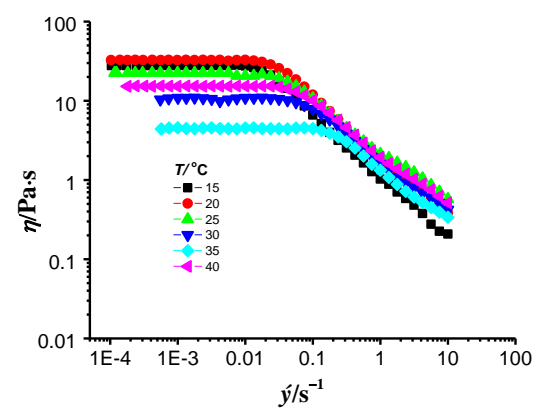

Supplement: c3sm51017d.pdf [file c3sm51017d.pdf]
